# Supplementary material for: Intermittent Noise Induces Physiological Stress in a Coastal Marine Fish
Source: PLoS One. 2015 Sep 24;10(9):e0139157. doi: 10.1371/journal.pone.0139157 (PMC4581866; doi:10.1371/journal.pone.0139157)
Supplement: S1 Data — (XLS) [file pone.0139157.s004.xls]

## Sheet: cortisol over time
trial #	exposure time (min)	treatment	cortisol (pg/g)
1	10	boat noise	6078.63
2	10	control	4794.85
3	30	boat noise	6503.4
4	30	control	5578.91
5	60	boat noise	8022.7
6	60	control	4536.44
7	90	boat noise	7241.57
8	90	control	3358.98
9	120	boat noise	4221.23
10	120	control	5528.52
